# Supplementary material
Source: publisher figshare collection journal article supplement (https://sage.figshare.com/ndownloader/files/20135900)
Supplement: Supplementary file 1 [file 20135900]

**Dr Daniel Terry** has a PhD, which focuses on the acculturation and retention of International Medical Graduates in rural Tasmania. As an Academic with Federation University Australia and has extensive post-doctoral research experience on rural health, rural workforce, and chronic-ill health. With a background in community health nursing, his current research interest are nursing student career trajectory, rural health employment and profession longevity, while he has an keen interest in improving paediatric injury, paediatric asthma, and the public perception of medical errors.

**Dr Jeong-ah Kim**, has a PhD in Occupational Health management system is an academic at Federation University with an expertise in the field of nursing, public & occupational health and patient safety for the last 20 years. She is also the winner of the National award for excellence in PhD. She has broad experience in teaching and researching nursing, Occupational Health & Safety and other health discipline areas. She is particularly interested and has been undertaking in many projects that analyses how different system, methods, environments, health issues influence society, our well-being and consumers' health & safety.

**Julia Gilbert** is a lecturer and course coordinator at Federation University in Ballarat, Victoria. She is a Registered Nurse and midwife with over 30 years clinical experience in a variety of areas including critical care, neonatal intensive care and aged care. In addition to her extensive nursing experience she was admitted to the Supreme Court of Queensland as a legal practitioner in 2008. She is currently completing her PhD into dementia care.

**Dr Sun Hee (Sunny) Jang** has a PhD and is a Lecturer in the Wicking Dementia Research and Education Centre, College of Health and Medicine, University of Tasmania, Tasmania, Australia. Her background is health informatics. She has a unique blend of expertise with computing, teaching and multidisciplinary research backgrounds. She is currently conducting health-related research projects with different stakeholders. Her research interests include, but not limited to, technology enhanced learning and teaching, effective online education, cultural competence in dementia care, healthy ageing and public health. She is currently leading a project which engages with culturally and

linguistically diverse communities in Australia to develop multimedia educational resources for health education.

**Dr Hoang Nguyen** has a PhD and is a Lecturer in the Wicking Dementia Research and Education Centre, College of Health and Medicine, University of Tasmania, Tasmania, Australia. Her current research interests are in rural health and community health, dementia care, and higher education.
